# Supplementary material for: La(OTf)3-mediated self-organization of guanosine with an alkynyl-Au(i)PPh3 moiety to induce Au(i)–Au(i) interactions
Source: Royal Society of Chemistry journal article supplement (doi:10.1039/c2ra01196d), 2012-01-01
Supplement: c2ra01196d.pdf [file c2ra01196d.pdf]

## Supplementary Information for

# La(OTf)<sub>3</sub>-mediated self-organization of guanosine having alkynyl-Au(I)PPh<sub>3</sub> moiety to induce Au(I)-Au(I) interaction

Xiangtai Meng,<sup>a</sup> Toshiyuki Moriuchi,<sup>\*a</sup> Yuki Sakamoto,<sup>a</sup> Masatoshi Kawahata,<sup>b</sup> Kentaro Yamaguchi<sup>b</sup> and Toshikazu Hirao<sup>\*a</sup>

<sup>a</sup>Department of Applied Chemistry, Graduate School of Engineering,  
Osaka University,

Yamada-oka, Suita, Osaka 565-0871, Japan

E-mail: moriuchi@chem.eng.osaka-u.ac.jp, hirao@chem.eng.osaka-u.ac.jp

<sup>b</sup> Pharmaceutical Sciences at Kagawa Campus, Tokushima Bunri University

1314-1 Shido, Sanuki, Kagawa 769-2193, Japan.

E-mail: yamaguchi@kph.bunri-u.ac.jp

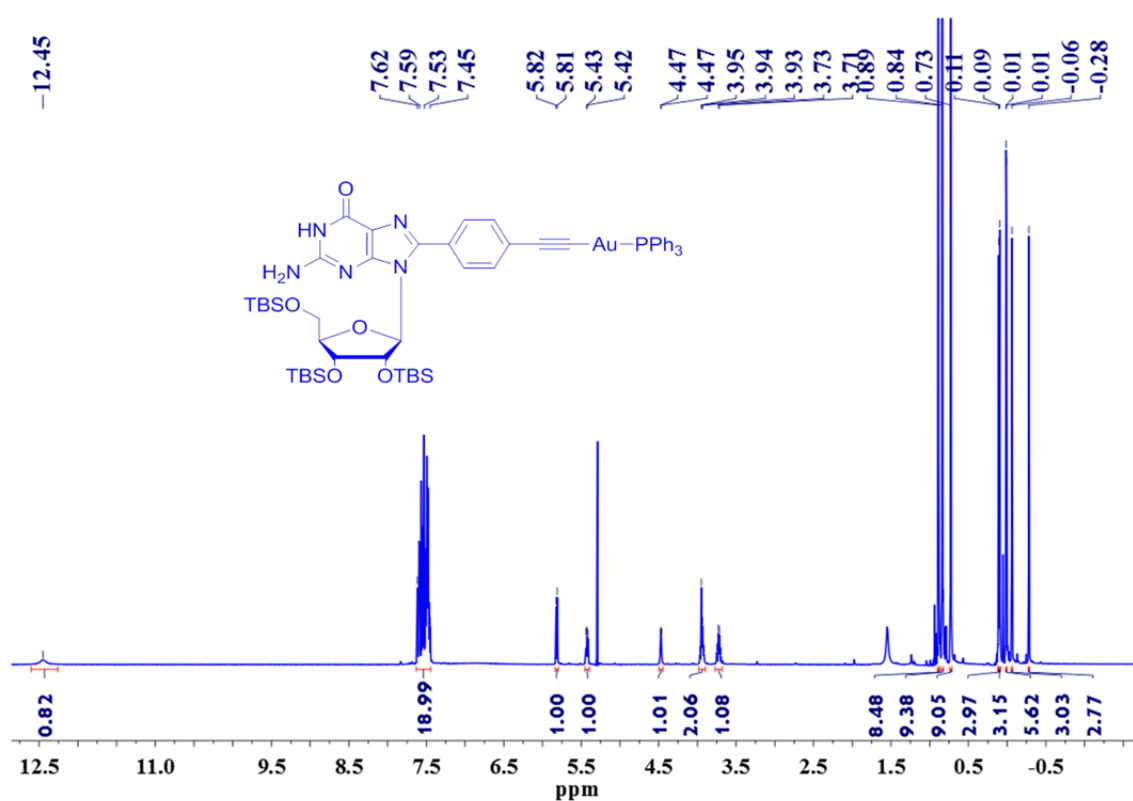

Figure S1. <sup>1</sup>H NMR of GPhAuPPh<sub>3</sub> (CDCl<sub>3</sub>, 400 MHz).

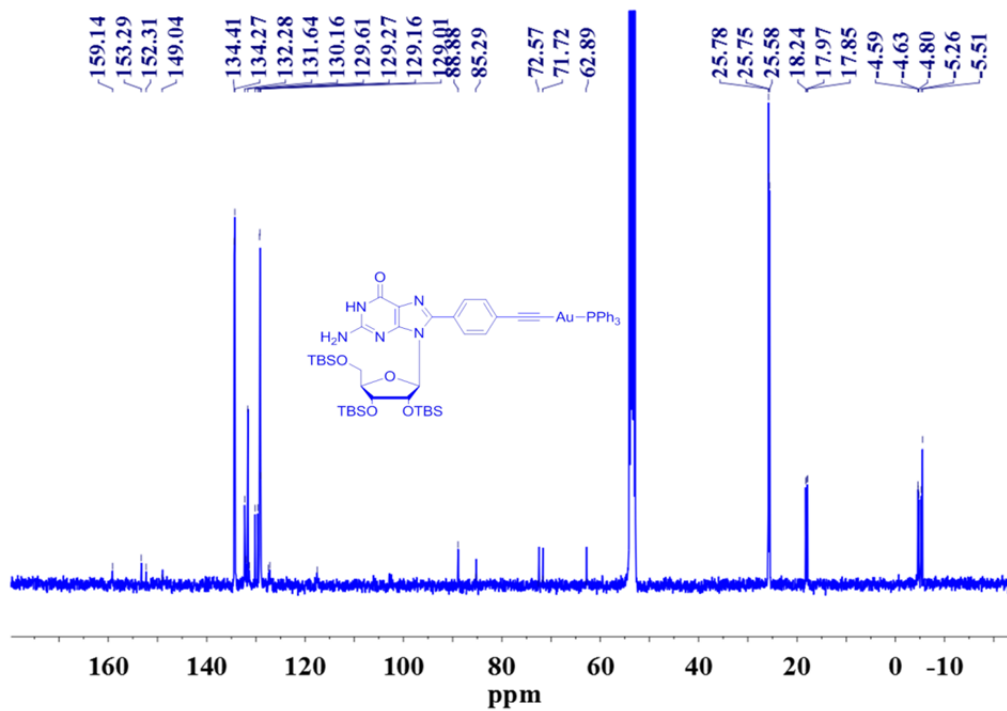

Figure S2.  $^{13}\text{C}$  NMR of GPhAuPPh<sub>3</sub> (CDCl<sub>3</sub>, 400 MHz).

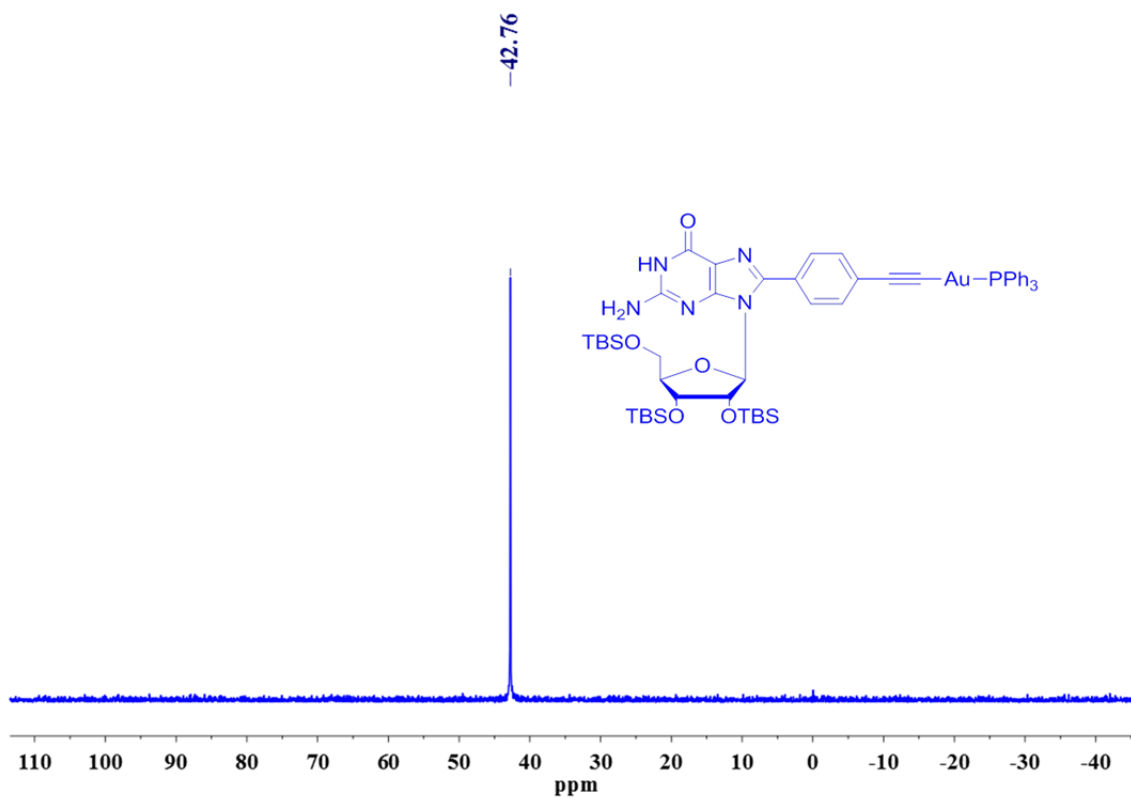

Figure S3.  $^{31}\text{P}$  NMR of GPhAuPPh<sub>3</sub> (CDCl<sub>3</sub>, 109 MHz).

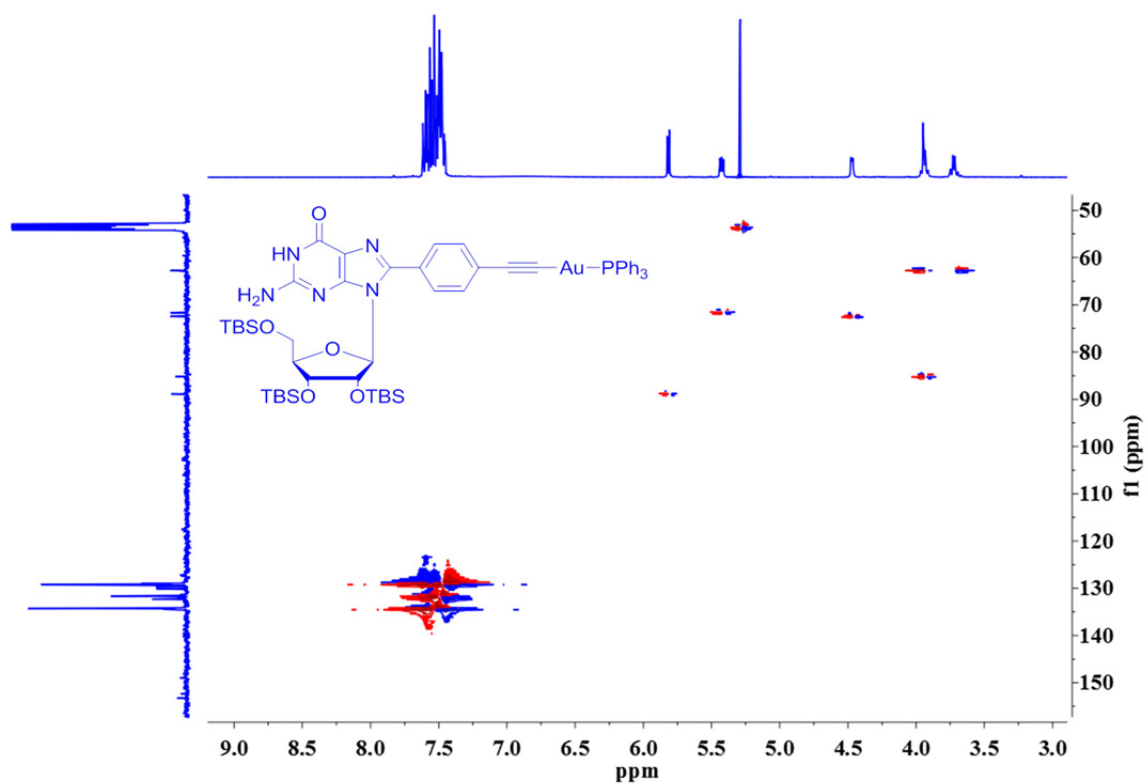

**Figure S4.** HSQC of GPhAuPPh<sub>3</sub> (CDCl<sub>3</sub>, 400 MHz).

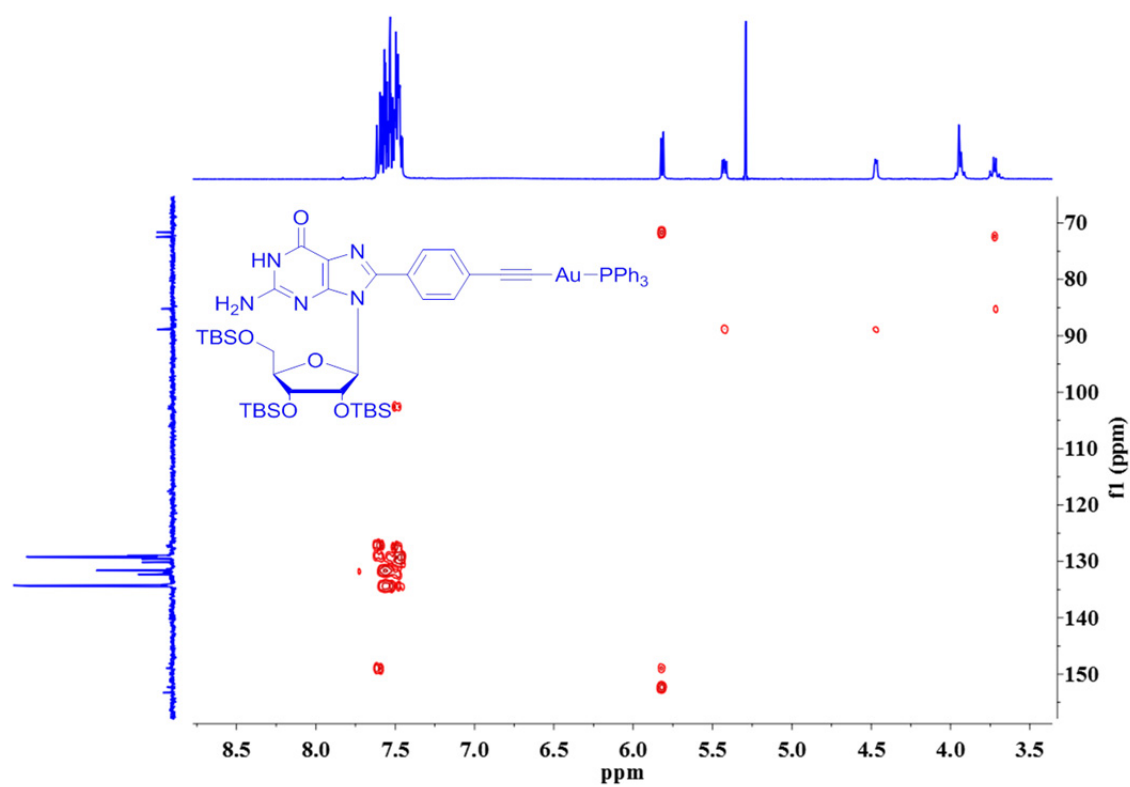

**Figure S5.** HMBC of GPhAuPPh<sub>3</sub> (CDCl<sub>3</sub>, 400 MHz).

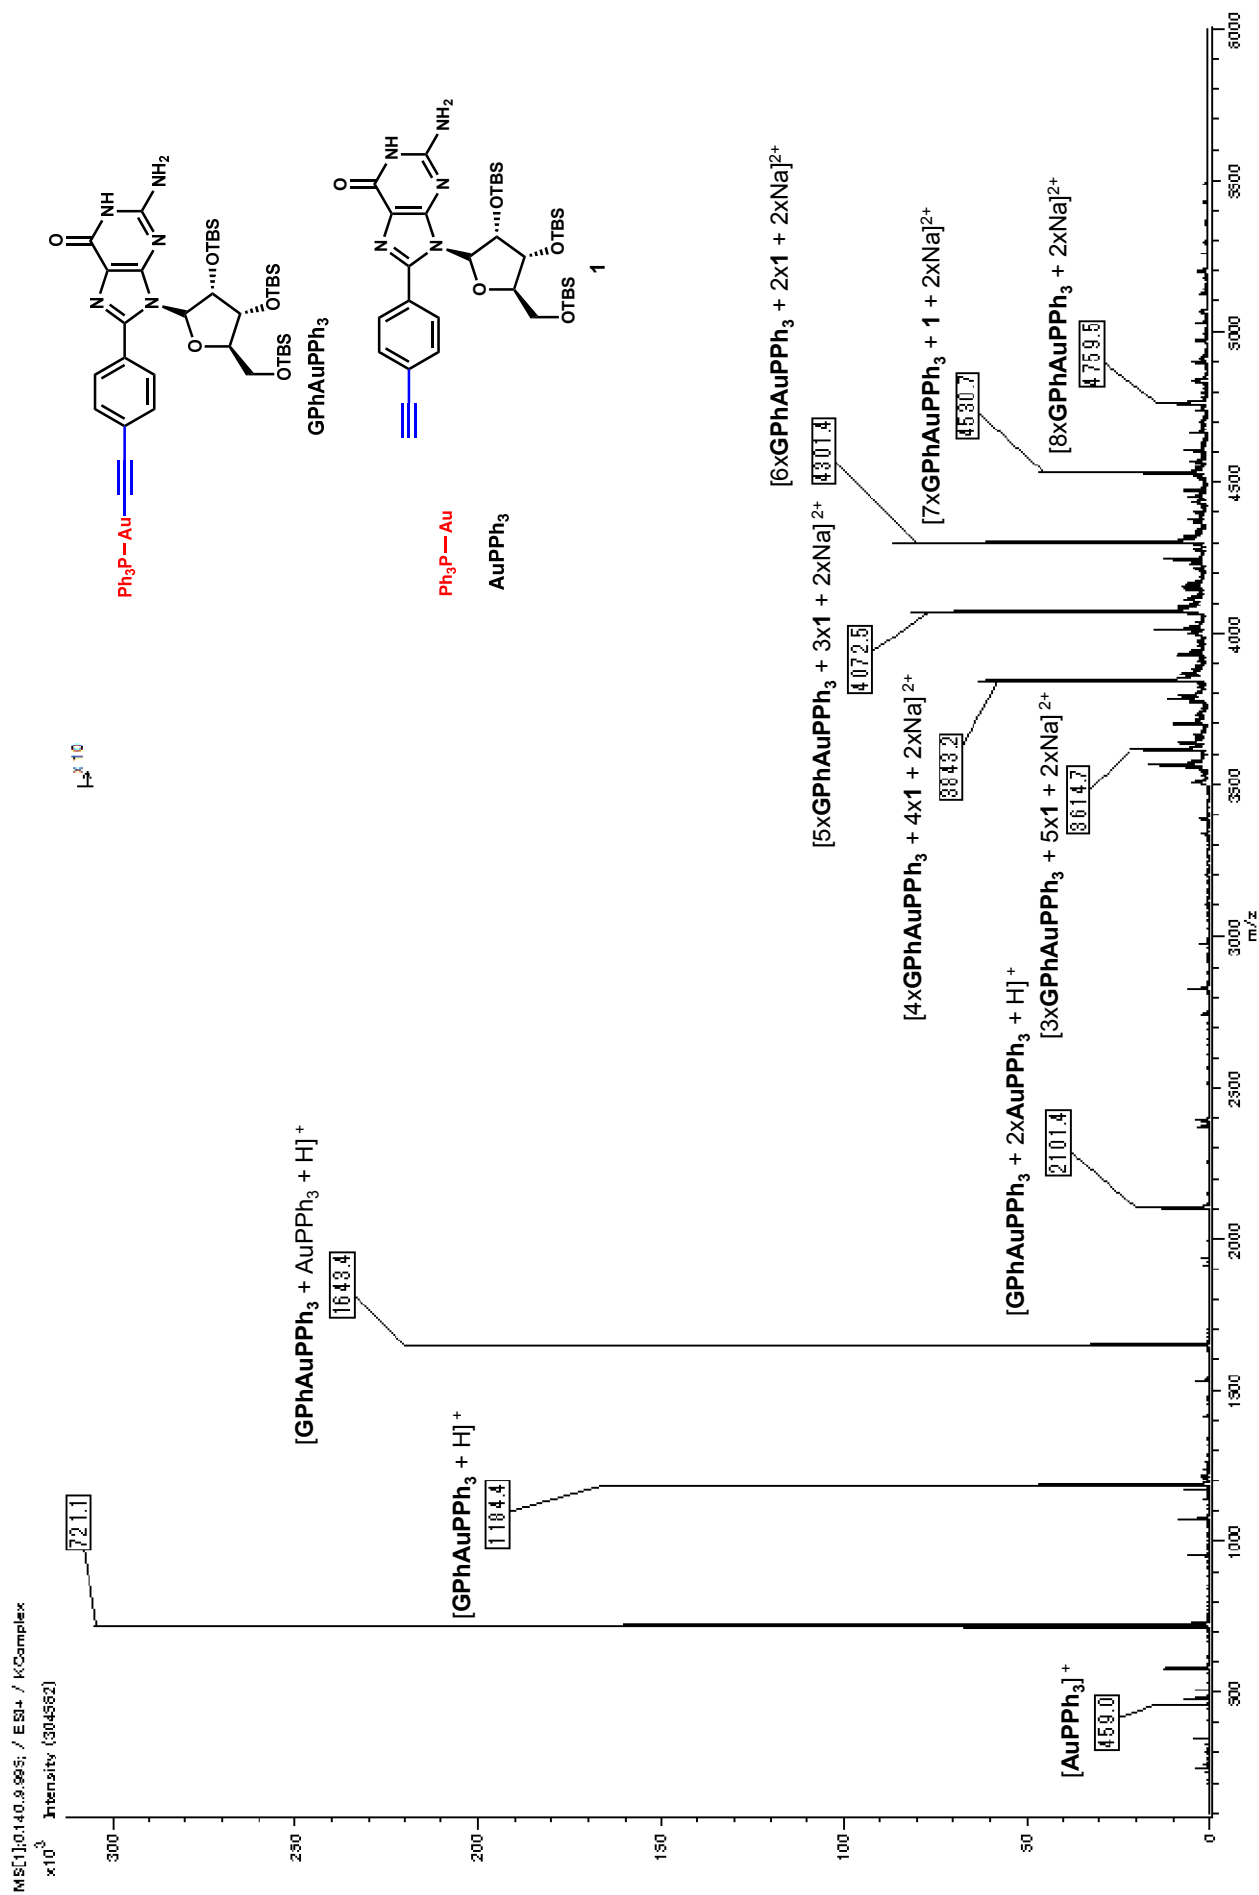

Figure S6. The CSI-MS spectrum of the octamer of GPhAuPPh<sub>3</sub> with KPF<sub>6</sub>.

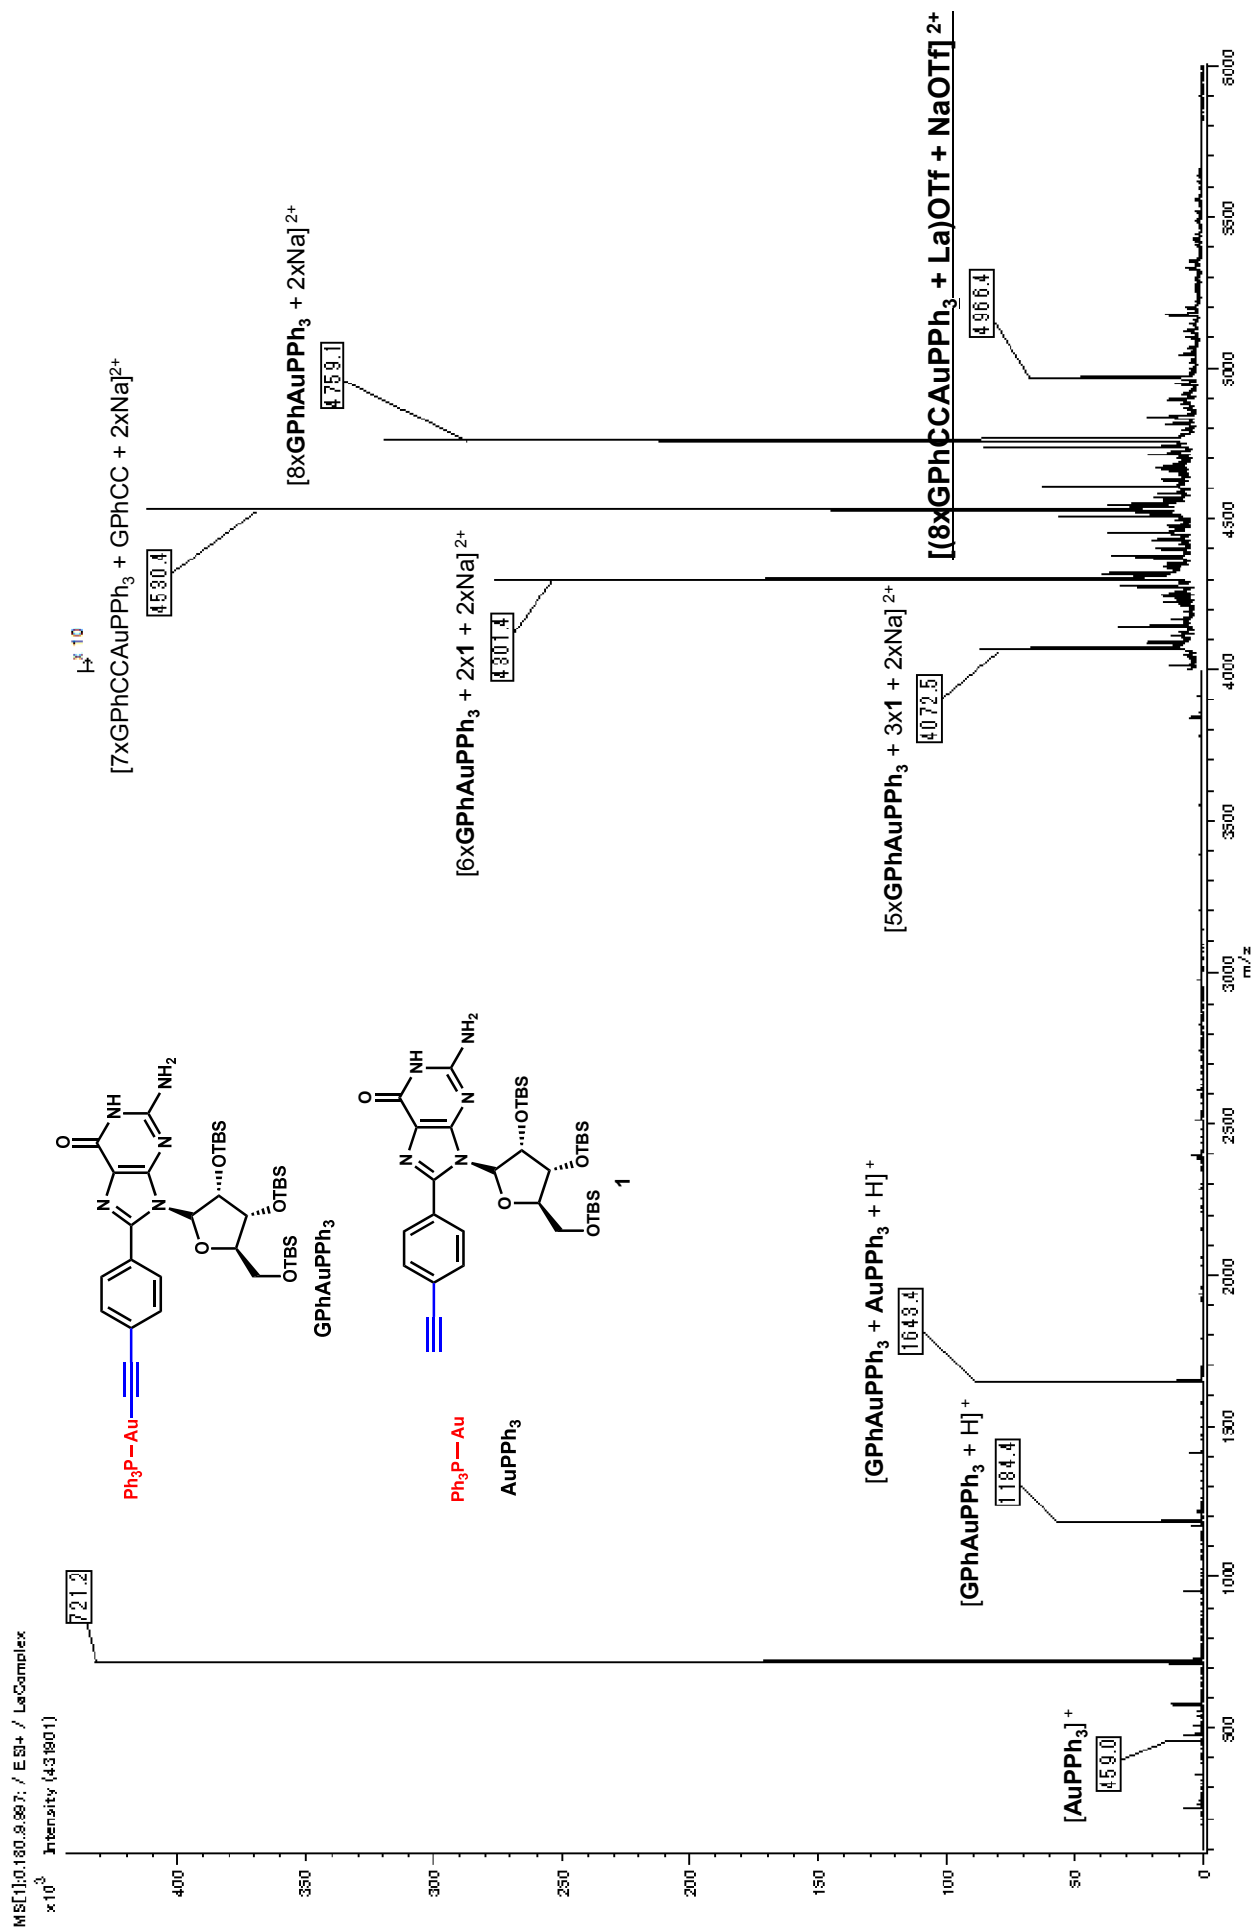

**Figure S7.** The CSI-MS spectrum of the octamer of GPhAuPPh<sub>3</sub> with La(OTf)<sub>3</sub>.
